# Supplementary material for: Over-Expression of Ephrin-A5 in Mice Results in Decreasing the Size of Progenitor Pool through Inducing Apoptosis
Source: PubMed Central journal article supplement — Mol Cells. 2015 Dec 15;39(2):136–40. doi: 10.14348/molcells.2016.2245 (PMC4757801; doi:10.14348/molcells.2016.2245), 2015-12-15

**Supplementary Figure 1. The ectopic ephrin-A5 induced apoptotic cell death in an autonomous manner.** The eA5- $\alpha$ -Cre double Tg embryo at E13.5 was isolated and then the horizontal sections of the neural retina were subjected to immunohistochemical staining with both anti-FLAG (red) and anti-cleaved caspase3 (green) antibodies. Note that the FLAG-tagged human ephrin-A5 is specifically expressed in the nasal retina and that these cells were also positive for anti-cleaved caspase3 antibodies.

**A**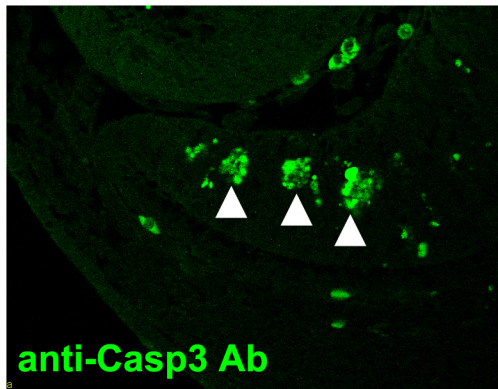**B**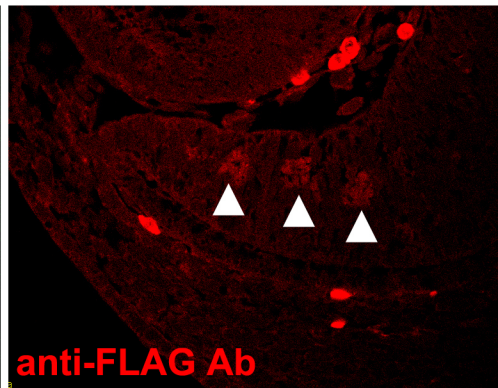**C**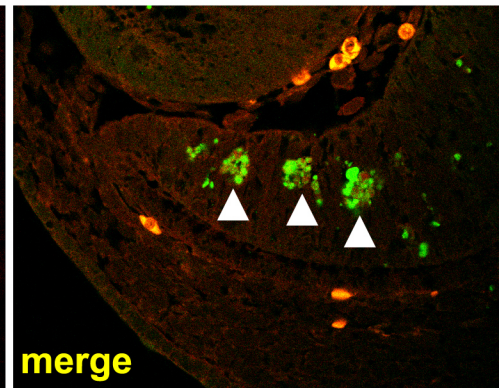

Supplement: molce-39-2-136-supple.pdf [file molce-39-2-136-supple.pdf]
